# Supplementary material
Source: Springer Nature journal article supplement (https://www.springermedizin.de/resource/supplementary/12889_2013_6610_MOESM5_ESM.pdf/9498728)

(a)

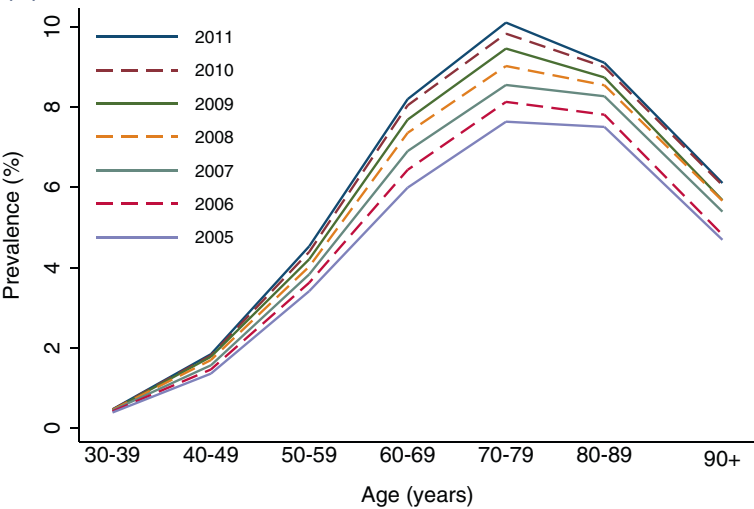

(b)

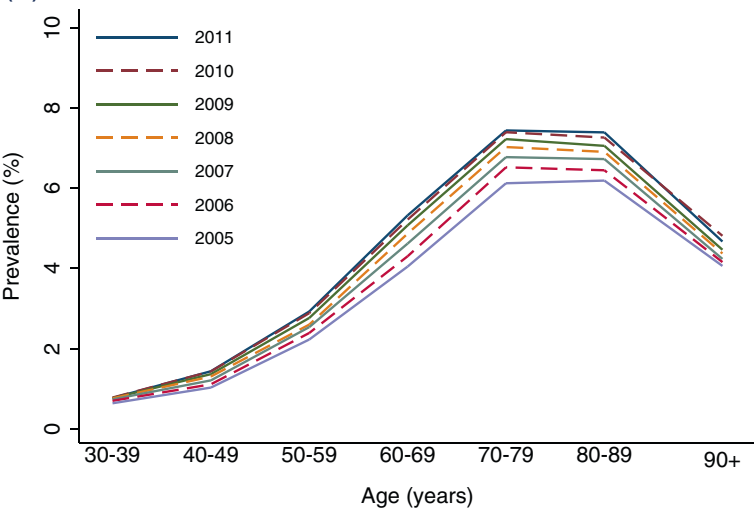

Supplement: MOESM5 [file 9498728]
